# Supplementary material for: Astilbin fromSmilax glabraRoxb. alleviates high-fat diet-induced metabolic dysfunction
Source: Royal Society of Chemistry journal article supplement (doi:10.1039/d2fo00060a), 2022-01-01
Supplement: d2fo00060a1.pdf [file d2fo00060a1.pdf]

**Astilbin from *Smilax glabra* Roxb. alleviates high-fat diet–induced  
metabolic dysfunction**

**Tingwei Wang<sup>1</sup>, Yongli Ye<sup>1</sup>, Jian Ji<sup>1</sup>, Shuang Zhang<sup>2</sup>, Xingxing Yang<sup>1</sup>, Jiayuan  
Xu<sup>1</sup>, Jiasheng Wang<sup>3</sup>, Zhiyuan Chen<sup>4</sup>, Bangen Xia<sup>5</sup>, Hongfang Shen<sup>5</sup>, Ruowei  
Xia<sup>5</sup>, Wenqin Shi<sup>5</sup>, Xiulan Sun<sup>1\*</sup>**

<sup>1</sup>School of Food Science, State Key Laboratory of Food Science and Technology, National Engineering Research Center for Functional Foods, School of Food Science Synergetic Innovation Center of Food Safety and Nutrition, Joint International Research Laboratory on Food Safety, Jiangnan University, Wuxi, Jiangsu 214122, China

<sup>2</sup> State Key Laboratory of Food Science and Technology, Jiangnan Analysis and Testing Center, Jiangnan University, Wuxi, Jiangsu 999078, China

<sup>3</sup> Department of Environmental Health Science, College of Public Health, University of Georgia, Athens, GA, USA

<sup>4</sup> College of Chinese Medicine, Macau University of Science and Technology, Macau, 999078, China

<sup>5</sup> Ningbo Xiabang New Pharmaceutical Technology Co., Ltd., Ningbo, Zhejiang, 315000, China

\*Corresponding authors: Xiulan Sun

Xiulan Sun: E-mail address: [sxlzzz@jiangnan.edu.cn](mailto:sxlzzz@jiangnan.edu.cn)

### **MRM assay for astilbin**

We used an ACQUITY UPLC TQD ultra performance liquid chromatography tandem triple quadrupole mass spectrometer (Waters Corporation, USA) set up an MRM assay for astilbin and tested the purchased standards. A liquid-phase method was used as follows: column: Waters BEH Shield RP18 column,  $2.1 \times 100 \text{ mm}^2$  id, 5- $\mu\text{m}$  film thickness (Waters, USA); mobile phases A and B: acetonitrile and 0.1% formic acid solution; flow rate: 0.3 mL/min; and column temperature: 45°C. The elution gradient was set as follows: 0-3 min, 5%-20% A; 3-5 min, 20%-40% A; 5-8 min, 40%-100% A, and the injection volume was 5  $\mu\text{L}$ .

Mass spectrometry conditions: ionization mode: ESI-, capillary voltage: 3.0 k Volts, cone: 20/50 Volts, source block temperature: 100 °C, desolvation temperature: 400 °C, desolvation gas flow: 700 lit/hr, cone gas flow: 50 lit/hr, collision energy (eV) :6, detector voltage: 1800 Volts, ion pair: 449-151, 449-285,449-303. The chromatograms and MRM mode mass spectra are shown in Fig. s5

s1

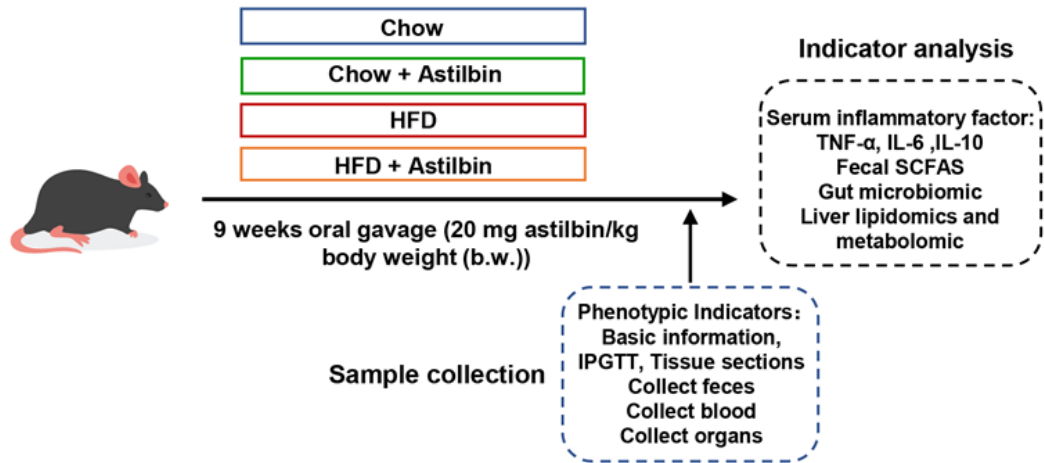

a

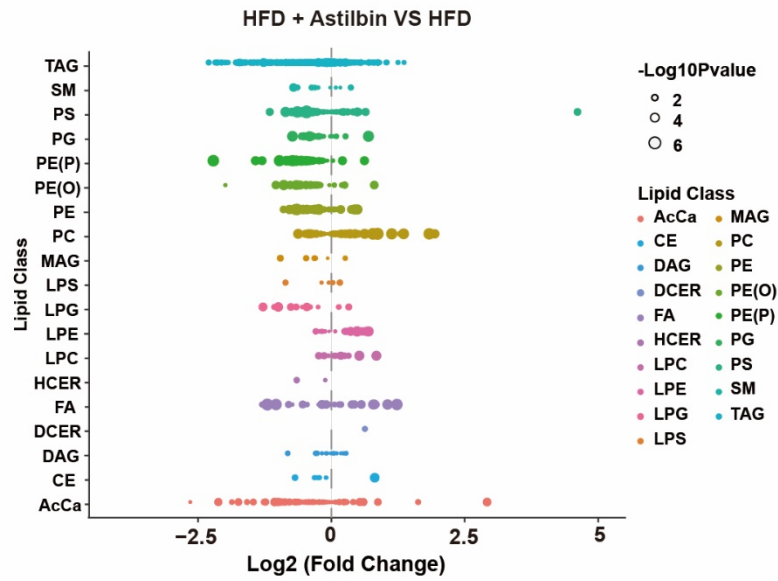

b

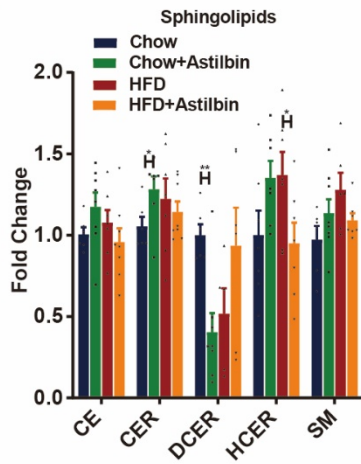

c

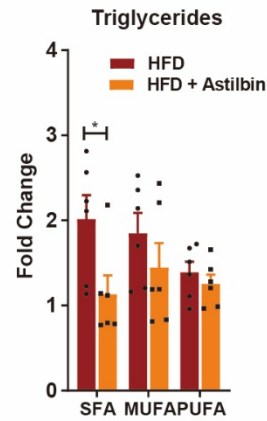

d

| Lipidlon         | Fold change | P-value  |
|------------------|-------------|----------|
| TAG(56:7/FA20:5) | 0.933016    | 0.004501 |
| TAG(54:6/FA18:2) | 0.842621    | 0.006688 |
| TAG(55:2/FA18:2) | 0.411757    | 0.00689  |
| TAG(52:5/FA16:0) | 0.973564    | 0.00833  |
| TAG(56:6/FA20:3) | 0.94084     | 0.008978 |
| TAG(52:6/FA16:1) | 0.986643    | 0.011012 |
| TAG(56:6/FA22:6) | 1.029228    | 0.013085 |
| TAG(56:8/FA18:1) | 1.196244    | 0.01385  |
| TAG(55:1/FA18:1) | 1.016715    | 0.021164 |
| TAG(54:5/FA20:4) | 0.945089    | 0.024522 |
| TAG(50:5/FA18:3) | 0.838938    | 0.02545  |
| TAG(54:6/FA20:4) | 0.939373    | 0.027399 |
| TAG(54:6/FA16:0) | 0.927384    | 0.029162 |
| TAG(54:4/FA20:2) | 0.904416    | 0.029762 |
| TAG(54:6/FA22:6) | 1.121496    | 0.041949 |
| TAG(54:7/FA22:6) | 1.109265    | 0.042664 |
| TAG(55:7/FA22:6) | 0.958775    | 0.046767 |
| TAG(56:8/FA16:1) | 0.977744    | 0.047557 |
| TAG(49:0/FA16:0) | 1.057419    | 0.048298 |
| TAG(56:4/FA18:1) | 0.846389    | 0.049217 |

e

| Lipidlon        | Fold Change | P-value  |
|-----------------|-------------|----------|
| PE(P-16:0/16:0) | 0.22312     | 9.72E-06 |
| PE(P-16:0/16:1) | 0.38797     | 0.002198 |
| PE(P-14:0/18:1) | 0.42331     | 0.003648 |
| LPG(20:4)       | 0.42832     | 0.003905 |
| PS(16:0/16:1)   | 0.46801     | 0.014554 |
| PE(O-16:0/20:4) | 0.5072      | 0.00696  |
| LPG(22:4)       | 0.52344     | 0.001223 |
| PE(P-18:1/20:3) | 0.53077     | 2.70E-05 |
| PE(14:0/22:5)   | 0.56049     | 0.030059 |
| PE(O-16:0/22:6) | 0.56234     | 0.000264 |
| PS(16:0/16:0)   | 0.5759      | 0.00025  |
| PC(18:0/22:5)   | 1.812       | 7.74E-06 |
| PC(18:1/20:5)   | 1.8245      | 0.004986 |
| PE(O-18:0/18:3) | 1.8441      | 0.006599 |
| LPC(20:5)       | 1.8971      | 0.000547 |
| PC(16:0/22:5)   | 1.9278      | 3.60E-06 |
| PC(18:2/20:5)   | 2.713       | 1.00E-04 |
| PC(18:0/20:0)   | 3.7944      | 1.89E-05 |
| PC(20:0/20:5)   | 4.0803      | 0.001748 |
| PS(20:0/20:5)   | 26.588      | 0.023116 |

a

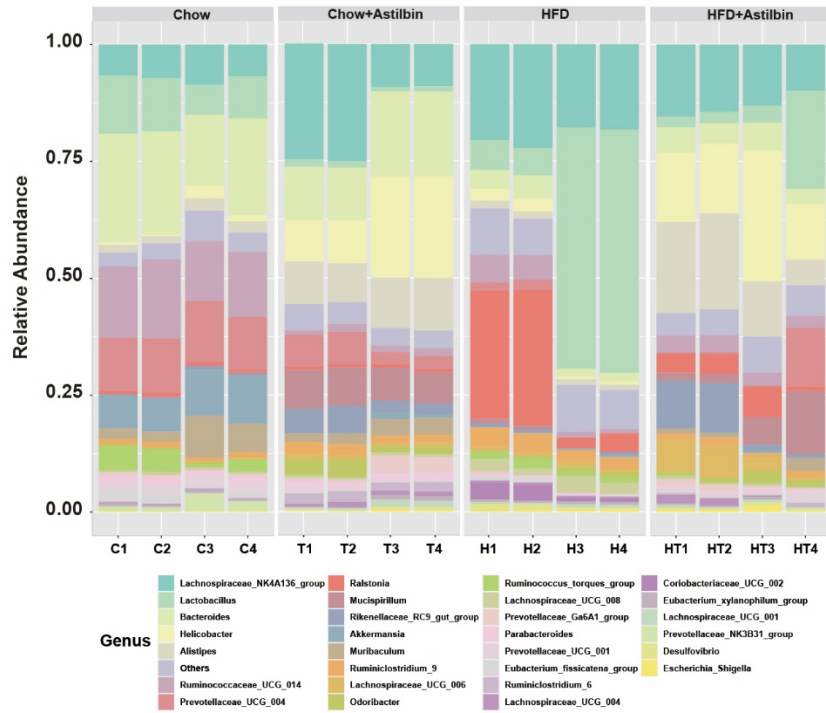

b

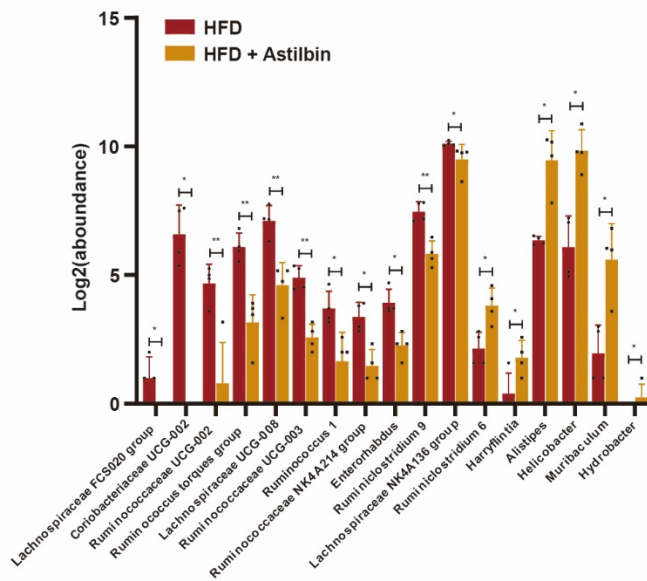

c

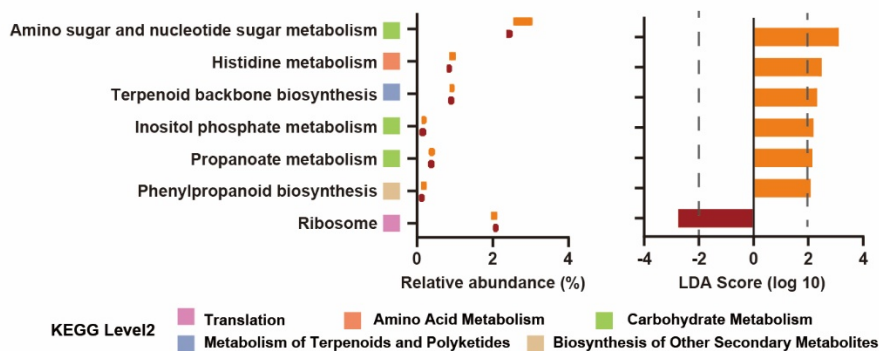

s4

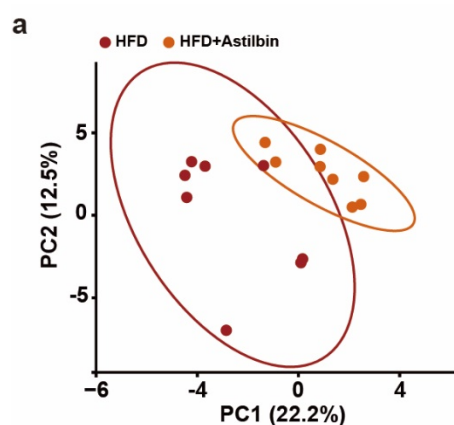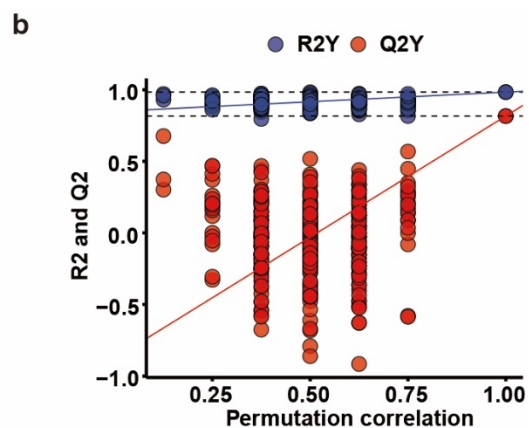

**c**

| Number | Metabolites                            | Fold Change | P-value | VIP   |
|--------|----------------------------------------|-------------|---------|-------|
| 1      | L-Proline                              | 0.352       | 0.017   | 1.458 |
| 2      | D-2-Aminobutyric acid                  | 0.409       | 0.013   | 1.434 |
| 3      | N-Acetylmethionine                     | 0.431       | <0.001  | 1.952 |
| 4      | beta-Alanine                           | 0.437       | <0.001  | 2.133 |
| 5      | 4-Aminobutanoate                       | 0.451       | <0.001  | 1.872 |
| 6      | 4-Chloropyridine-2,6-Dicarboxylic Acid | 0.506       | 0.046   | 1.043 |
| 7      | Tryptamine                             | 0.564       | 0.029   | 1.366 |
| 8      | D-Arabitol                             | 0.566       | 0.003   | 1.614 |
| 9      | Glutamate                              | 0.566       | 0.024   | 1.406 |
| 10     | L-Ornithine hydrochloride              | 0.572       | 0.037   | 1.260 |
| 11     | Oleamide                               | 0.576       | 0.018   | 1.383 |
| 12     | Xanthine                               | 0.580       | 0.001   | 1.831 |
| 13     | N-Acetyl-D-glucosamine                 | 0.587       | 0.018   | 1.353 |
| 14     | L-Asparagine                           | 0.605       | 0.024   | 1.332 |
| 15     | L-Cysteine                             | 0.619       | 0.016   | 1.512 |
| 16     | sn-Glycerol-1-phosphate                | 0.630       | 0.019   | 1.294 |
| 17     | 1-Monopalmitin                         | 0.657       | 0.002   | 1.653 |
| 18     | Pentitol                               | 0.666       | <0.001  | 1.835 |
| 19     | D-Panose                               | 1.543       | 0.037   | 1.445 |
| 20     | Adenine                                | 1.597       | 0.011   | 1.561 |
| 21     | Lactitol                               | 1.616       | 0.015   | 1.611 |
| 22     | Trehalose                              | 1.647       | 0.011   | 1.639 |
| 23     | Adenosine                              | 1.726       | 0.025   | 1.522 |
| 24     | beta-Sitosterol                        | 1.754       | 0.024   | 1.372 |
| 25     | Lactobionic acid                       | 2.089       | 0.011   | 1.379 |
| 26     | Arabinose 5-phosphate                  | 4.211       | <0.001  | 1.869 |
| 27     | Adenosine 5-Monophosphate              | 5.926       | <0.001  | 2.233 |

s5

a

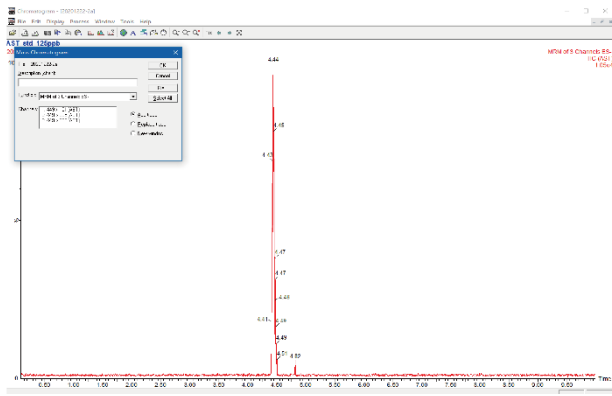

b

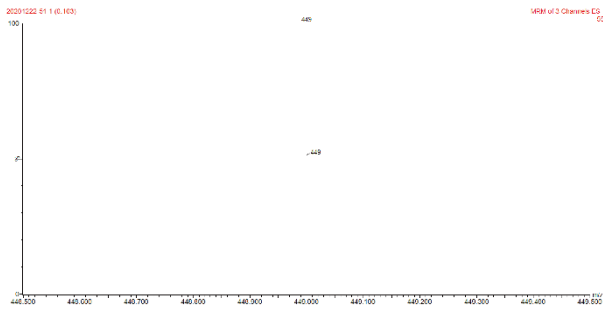

## Figure Captions

**Figure s1.** Development of astilbin intervention models.

**Figure s2.** Effects of astilbin consumption on HFD-induced liver lipid metabolism disorders. **(a)** Log<sub>2</sub> fold changes in lipid species in the HFD + Astilbin versus HFD groups and the corresponding significance values displayed as  $-\log_{10}(P \text{ value})$ . Each dot represents a lipid species, and the dot size indicates significance. **(b)** Intensity fold change of sphingolipids. **(c)** Levels of SFA, MUFA, and PUFA in the liver TG of mice in the HFD + Astilbin and HFD groups. **(d)** Top 20 TGs according to the  $P$  value, detected in livers of mice in the HFD + astilbin and HFD groups ( $n = 8$ ). **(e)** Top 20 glycerophospholipids according to the  $P$  value, detected in livers of mice in the HFD + Astilbin and HFD groups ( $n = 8$ ).

**Figure s3.** Effects of astilbin consumption on microbiota composition of HFD-fed mice. **(a)** Bar graph of bacterial abundance at the genus level. **(b)** Astilbin consumption induced altered flora in HFD mice. **(c)** LDA-based analysis of KEGG level 3 in the HFD + Astilbin versus HFD groups significantly altered the pathway.

**Figure s4.** Effect of astilbin on liver metabolism in HFD-fed mice. **(a)** PCA analysis of major sources of metabolite variability. **(b)** Validation plot for discriminating HFD + Astilbin and HFD groups. **(c)** Statistical analysis of differential metabolites in the liver to distinguish the HFD + Astilbin group from the HFD group.

**Figure s5.** Characterization of astilbin. **(a)** Chromatogram and ion pair information. **(b)** MRM mode mass spectra.
